# Supplementary material
Source: PubMed Central journal article supplement (PMC6661357)
Supplement: rspb20191332supp1.pdf [file rspb20191332supp1.pdf]

Supplementary Information for:

**No evidence that warmer temperatures are associated with selection for smaller body sizes**

Adam M. Siepielski<sup>1\*</sup>, Michael B. Morrissey<sup>2</sup>, Stephanie M. Carlson<sup>3</sup>, Clinton D. Francis<sup>4</sup>, Joel G. Kingsolver<sup>5</sup>, Kenneth D. Whitney<sup>6</sup>, and Loeske E.B. Kruuk<sup>7</sup>

*Proceedings of the Royal Society of B: Biological Sciences*

<https://doi.org/10.1098/rspb.2019.1332>

**Affiliations:**

<sup>1</sup>Department of Biological Sciences, University of Arkansas, Fayetteville, AR, U.S.A.

<sup>2</sup>School of Biology, University of St. Andrews, St. Andrews, U.K.

<sup>3</sup>Department of Environmental Science, Policy, and Management, University of California Berkeley, CA, U.S.A.

<sup>4</sup>Department of Biological Sciences, Cal Poly State University, 1 Grand Ave, San Luis Obispo, CA 93407, U.S.A.

<sup>5</sup>Department of Biology, University of North Carolina, Chapel Hill, NC, U.S.A.

<sup>6</sup>Department of Biology, MSC03-2020, University of New Mexico, Albuquerque, NM, U.S.A.

<sup>7</sup>Research School of Biology, The Australian National University, Canberra, Australia.

**This file contains:**

Methods and Results of the full phylogenetic random regression model  
Variance components associated with Model 1 presented in the main text  
Figures S1-S4  
Table S1-S3

## Methods and Results of the full phylogenetic random regression model

The models presented in the main text contains a random term for species to account for differences in selection among species. We present here a full phylogenetic random regression model that separates out the phylogenetic component of this species effect, to account for any lack of independence originating from shared evolutionary history among the species in the dataset. We constructed this elaboration for Models 1 and 2 of the main text, as these are the core models of our analysis. We followed the general recommendations developed by [1] and [2] to construct the models. Below we describe the construction of the phylogeny, and construction and results from the full phylogenetic random regression model.

### Phylogeny construction

We constructed a phylogeny for the species in our selection database. Our target species consisted of nine birds, seven fish, seven insects, five mammals, three reptiles, and one amphibian (Table S1). We used GenBank to obtain mitogenomes for each of the 32 target species (or a congeneric or confamilial, if the target species was not available) plus two Cnidarian outgroup taxa (*Acropora aculeus* and *Nematostella* sp.). After extracting five mitochondrial loci (CO1, CO2, CO3, COB, and ND2), we aligned locus-specific alignments with MAFFT v7.215 [3] in Geneious [4]. We used PartitionFinder2 [5] to determine optimal partitioning schemes and models of sequence evolution; GTR+G was used for all genes. We constrained the tree with a series of monophyletic statements and ran  $10^7$  MCMC generations with a linked clock and tree model in BEAST2 [6] via the CIPRES Science Gateway v. 3.3 [7]. We then used TreeAnnotator v.1.10 [6] with a 5% burn-in to get a single best tree with mean node heights and visualized the tree in FigTree v1.4.4 (<http://tree.bio.ed.ac.uk/software/figtree/>). The tree was made ultrametric using the *compute.brlen* function in the R package *ape* [8]. The phylogeny is provided as a .nex file.

## Meta-analytical model

Our phylogenetic random regression extension of Models 1 and 2 in the main text took the form

$$\beta_{ijk} = A + B t_{ijk} + (a_j + b_j \cdot t_{ijk}) + (sp_k + sp\_b_k \cdot t_{ijk}) + (sn_k + sn\_b_k \cdot t_{ijk}) + \epsilon_{ijk} + e_{ijk},$$

where, as before:  $\beta_{ijk}$  is the  $i^{\text{th}}$  selection coefficient estimate for dataset  $j$  in species  $k$ ;  $A$  and  $B$  are the fixed effect intercept and slope, respectively, of the regression of selection coefficients on annual temperature values,  $t_{ijk}$ ;  $\epsilon_{ijk}$  are measurement errors,  $\epsilon_{ijk} \sim N(0, SE_{ijk}^2)$ ; and  $e_{ijk}$  are residuals distributed as  $e_{ijk} \sim N(0, \sigma_e^2)$ . In addition, this model contains the random intercepts  $sp_k$  and slopes  $sp\_b_k$  for the phylogenetic component of the species effect, distributed as:

$$\begin{bmatrix} sp_k \\ sp\_b_k \end{bmatrix} \sim N \left( \begin{bmatrix} 0 \\ 0 \end{bmatrix}, \begin{bmatrix} \sigma_{sp}^2 & \sigma_{sp,sp\_b} \\ \sigma_{sp,sp\_b} & \sigma_{sp\_b}^2 \end{bmatrix} \right),$$

and intercepts and slopes  $sn_k$  and  $sn\_b_k$  for the non-phylogenetic component of the species effect (with equivalent variances and covariance  $\sigma_{sn}^2$ ,  $\sigma_{sn\_b}^2$  and  $\sigma_{sn,sn\_b}^2$ ).

As above, the model was implemented in the R package MCMCglmm [9]. The prior and model were specified as follows:

```
prior_PhyloRR=list(R=list(V=1,nu=0.002),
G=list(G1=list(V=diag(2),n=1,alpha.mu=rep(0,2),alpha.V=diag(2)*1000),
        G2=list(V=diag(1),n=0.002),
        G3=list(V=diag(1),n=0.002)))

model_PhyloRR<- MCMCglmm(estSelCoef~1+ envMeanCenter,
random=~us(1+envMeanCenter):dataset+Species+SpeciesPermEnv, mev=mev
,data=d_grads_time_ses_size_anim
,ginverse=list(Species=Ainv.UM),prior=pr_Prior
,nitt=2600000,thin=2000,burnin=600000,verbose=FALSE)
```

All autocorrelation values were  $<0.05$ .

## Results

The results from the phylogenetic random regression were qualitatively the same as those presented in the main text. In particular, there was no evidence of an effect of temperature on either selection gradients (Table S3a) or selection differentials (Table S3b). There was also no support for any phylogenetic component to the species effect, nor for any variance in slopes or intercepts within either the phylogenetic or non-phylogenetic species effects for selection gradients (Table S3a) or differentials (Table S3b). The only exception from these phylogenetically informed results is that, although the estimates of the fixed effect intercepts are very similar (gradients 0.129, differentials 0.221 here; gradients 0.107, differentials 0.156 in the main text), the 95% CIs are considerably wider and hence span zero, reflecting the greater degree of uncertainty in the models incorporating phylogenetic effects.

## Supplementary Tables

**Table S1.** Taxa included in the phylogenetic analysis, with GenBank accession numbers.

| Group     | Target Species                            | Sequence used                   | GenBank Accession | Sequence length |
|-----------|-------------------------------------------|---------------------------------|-------------------|-----------------|
| Amphibian | <i>Bufo valliceps</i>                     | <i>Bufo stejnegeri</i>          | KR136211.1        | 17939           |
| Bird      | <i>Petrochelidon pyrrhonota</i>           | <i>Cecropis daurica</i>         | KJ499911.1        | 17949           |
| Bird      | <i>Parus caeruleus</i>                    | <i>Cyanistes cyaneus</i>        | KX388472.1        | 16788           |
| Bird      | <i>Ficedula albicollis</i>                | <i>Ficedula albicollis</i>      | KF293721.1        | 16787           |
| Bird      | <i>Malurus cyaeneus</i>                   | <i>Malurus melanocephalus</i>   | KJ909199.1        | 15568           |
| Bird      | <i>Parus major</i>                        | <i>Parus major</i>              | NC_026293.1       | 16776           |
| Bird      | <i>Setophaga caeruleus</i>                | <i>Setophaga coronata</i>       | FJ236285.1        | 15583           |
| Bird      | <i>Spheniscus magellanicus</i>            | <i>Spheniscus magellanicus</i>  | KU361806.1        | 16659           |
| Bird      | <i>Tachycineta bicolor</i>                | <i>Tachycineta bicolor</i>      | JQ071614.1        | 17945           |
| Bird      | <i>Zosterops lateralis chlorocephalus</i> | <i>Zosterops lateralis</i>      | KC545407.1        | 17821           |
| Cnidarian | <i>Acropora aculeus</i>                   | <i>Acropora aculeus</i>         | NC_029251.1       | 18528           |
| Cnidarian | <i>Nematostella</i>                       | <i>Nematostella sp</i>          | DQ643835.1        | 16389           |
| Fish      | <i>Esox lucius</i>                        | <i>Esox lucius</i>              | AP004103.1        | 16695           |
| Fish      | <i>Oncorhynchus kisutch</i>               | <i>Oncorhynchus kisutch</i>     | MF621751.1        | 16660           |
| Fish      | <i>Oncorhynchus mykiss</i>                | <i>Oncorhynchus mykiss</i>      | MF621750.1        | 16660           |
| Fish      | <i>Oncorhynchus nerka</i>                 | <i>Oncorhynchus nerka</i>       | EF055889.1        | 16658           |
| Fish      | <i>Oncorhynchus tshawytscha</i>           | <i>Oncorhynchus tshawytscha</i> | AF392054.1        | 16644           |
| Fish      | <i>Salmo salar</i>                        | <i>Salmo salar</i>              | AF133701.1        | 16669           |
| Fish      | <i>Salmo trutta</i>                       | <i>Salmo trutta</i>             | AM910409.1        | 16687           |
| Insect    | <i>Aquarius remigis</i>                   | <i>Aquarius paludum</i>         | FJ456944.1        | 15380           |
| Insect    | <i>Calopteryx splendens</i>               | <i>Atrocalopteryx melli</i>     | MG011692.1        | 15562           |
| Insect    | <i>Tetraneura sorini</i>                  | <i>Eriosoma lanigerum</i>       | KP722582.1        | 15640           |
| Insect    | <i>Ischnura elegans</i>                   | <i>Ischnura elegans</i>         | KU958378.1        | 15962           |
| Insect    | <i>Oecanthus nigricornis</i>              | <i>Oecanthus sinensis</i>       | KY783908.1        | 16142           |
| Insect    | <i>Psilocorsis quercicella</i>            | <i>Promalactis suzukiella</i>   | KM875542.1        | 15507           |
| Insect    | <i>Scathophaga stercoraria</i>            | <i>Scathophaga stercoraria</i>  | KM200724.1        | 16223           |
| Mammal    | <i>Cervus elaphus</i>                     | <i>Cervus elaphus</i>           | AB245427.2        | 16357           |
| Mammal    | <i>Crocidura russula</i>                  | <i>Crocidura russula</i>        | NC_006893.1       | 17202           |
| Mammal    | <i>Chionomys nivalis</i>                  | <i>Microtus fortis</i>          | JF261174.1        | 16310           |
| Mammal    | <i>Mirounga leonina</i>                   | <i>Mirounga leonina</i>         | AM181023.1        | 16079           |
| Mammal    | <i>Ovis aries</i>                         | <i>Ovis aries</i>               | NC_001941.1       | 16616           |
| Reptile   | <i>Anolis sagrei</i>                      | <i>Anolis carolinensis</i>      | EU747728.2        | 17223           |
| Reptile   | <i>Lacerta agilis</i>                     | <i>Lacerta agilis</i>           | NC_021766.1       | 17089           |
| Reptile   | <i>Nerodia sipedon</i>                    | <i>Nerodia sipedon</i>          | JF964960.1        | 17706           |

**Table S2.** Full output from the meta-analytical models reported in the main text (Models 1 and 2), relating (2a) selection gradients and (2b) selection differentials to annual mean temperature. See Methods for full details of the model, which is set out in equation (2). Because effects of temperature may vary between study populations, we consider variation in slopes with temperature within each data-set, but there is no indication of any such variance in either gradients or differentials. Values shown are means of posterior distributions along with their 95% credible intervals.

| <b>Table S3a Selection gradients</b> |                                             |                                                                                                        |
|--------------------------------------|---------------------------------------------|--------------------------------------------------------------------------------------------------------|
| <b>Terms</b>                         | <b>Intercepts</b>                           | <b>Slopes (on temperature)</b>                                                                         |
| <i>Random effects</i>                |                                             |                                                                                                        |
|                                      | <i>variance</i>                             | <i>covariance/variance</i>                                                                             |
| data-set                             | $\sigma_a^2=0.00078$<br>(0.00015, 0.001572) | $\sigma_{a,b} = -0.00051$<br>(-0.00109, 0.00002)<br><br>$\sigma_b^2 = 0.0010560$<br>(0.00026, 0.00202) |
| species                              | $\sigma_s^2 = 0.01449$ (0.00362, 0.02889)   |                                                                                                        |
| residual                             | $\sigma_e^2 = 0.01179$ (0.01044, 0.01328)   |                                                                                                        |
| <i>Fixed effects</i>                 |                                             |                                                                                                        |
| Intercept (A)                        | 0.10784 (0.05084, 0.16778)                  |                                                                                                        |
| Slope (B)                            | -0.00384 (-0.02012, 0.00879)                |                                                                                                        |

| <b>Table S2b Selection differentials</b> |                                            |                                                                                                      |
|------------------------------------------|--------------------------------------------|------------------------------------------------------------------------------------------------------|
| <b>Terms</b>                             | <b>Intercepts</b>                          | <b>Slopes (on temperature)</b>                                                                       |
| <i>Random effects</i>                    |                                            |                                                                                                      |
|                                          | <i>variance</i>                            | <i>covariance/variance</i>                                                                           |
| data-set                                 | $\sigma_a^2=0.00033$<br>(0.00000, 0.00081) | $\sigma_{a,b} = -0.00001$<br>(-0.00023, 0.00020)<br><br>$\sigma_b^2 = 0.00009$<br>(0.00000, 0.00033) |
| species                                  | $\sigma_s^2=0.03038$ (0.00908, 0.05885)    |                                                                                                      |
| residual                                 | $\sigma_e^2=0.00249$ (0.001925, 0.00316)   |                                                                                                      |
| <i>Fixed effects</i>                     |                                            |                                                                                                      |
| Intercept (A)                            | 0.15618 (0.07347, 0.25398)                 |                                                                                                      |
| Slope (B)                                | 0.00017 (-0.00868, 0.00829)                |                                                                                                      |

**Table S3.** Results from the full meta-analytical phylogenetic random regression model relating (3a) selection gradients and (3b) selection differentials to annual mean temperature. For each of the three random effects of data-set, phylogenetic species effect ('species:phylo') and non-phylogenetic species effect ('species:non-phylo'), the table shows the variance-covariance values for intercepts and slopes. Values shown are means of posterior distributions along with their 95% credible intervals.

**Table S3a Selection gradients**

| <b>Terms</b>          | <b>Intercepts</b>                                  | <b>Slopes (on temperature)</b>                                                                                 |
|-----------------------|----------------------------------------------------|----------------------------------------------------------------------------------------------------------------|
| <i>Random effects</i> |                                                    |                                                                                                                |
|                       | <i>variance</i>                                    | <i>covariance/variance</i>                                                                                     |
| data-set              | $\sigma_a^2 = 0.000811$<br>(0.00000, 0.001862)     | $\sigma_{a,b} = -0.000507$<br>(-0.001351, 0.000256)<br>$\sigma_b^2 = 0.001456$<br>(0.000262, 0.002883)         |
| species:phylo         | $\sigma_{sp}^2 = 0.013811$<br>(0.00000, 0.055788)  | $\sigma_{sp,sp,b} = -0.003459$<br>(-0.024228, 0.010307)<br>$\sigma_{sp,b}^2 = 0.008642$<br>(0.00000, 0.034667) |
| species:non-phylo     | $\sigma_{sn}^2 = 0.015104$<br>(0.001359, 0.031904) | $\sigma_{sn,sn,b} = -0.006676$<br>(-0.023249, 0.002748)<br>$\sigma_{sn,b}^2 = 0.007585$<br>(0.00000, 0.028581) |
| residual              | $\sigma_e^2 = 0.015418$<br>(0.013401, 0.017394)    |                                                                                                                |
| <i>Fixed effects</i>  |                                                    |                                                                                                                |
| Intercept (A)         | 0.129 (-0.057, 0.280)                              |                                                                                                                |
| Slope (B)             | 0.079 (-0.229, 0.056)                              |                                                                                                                |

**Table S3b Selection differentials**

| <b>Terms</b>          | <b>Intercepts</b>                                  | <b>Slopes (on temperature)</b>                                                                                       |
|-----------------------|----------------------------------------------------|----------------------------------------------------------------------------------------------------------------------|
| <i>Random effects</i> |                                                    |                                                                                                                      |
|                       | <i>variance</i>                                    | <i>covariance/variance</i>                                                                                           |
| data-set              | $\sigma_a^2 = 0.000416$<br>(0.00000, 0.001003)     | $\sigma_{a,b} = 0.000004$<br>(-0.000212, 0.000219)<br><br>$\sigma_b^2 = 0.000071$<br>(0.000000, 0.000266)            |
| species:phylo         | $\sigma_{sp}^2 = 0.069346$<br>(0.00000, 0.21254)   | $\sigma_{sp,sp,b} = -0.006309$<br>(-0.072251, 0.028905)<br><br>$\sigma_{sp,b}^2 = 0.024197$<br>(0.00000, 0.096782)   |
| species:non-phylo     | $\sigma_{sn}^2 = 0.023494$<br>(0.000002, 0.067463) | $\sigma_{sn,sn,b} = -0.002173$<br>(-0.023711, 0.016987)<br><br>$\sigma_{sn,b}^2 = 0.00014379$<br>(0.00000, 0.053242) |
| residual              | $\sigma_e^2 = 0.001832$<br>(0.001318, 0.00233)     |                                                                                                                      |
| <i>Fixed effects</i>  |                                                    |                                                                                                                      |
| Intercept (A)         | 0.221 (-0.087, 0.635)                              |                                                                                                                      |
| Slope (B)             | 0.025 (-0.239, 0.185)                              |                                                                                                                      |



## Supplementary Figures

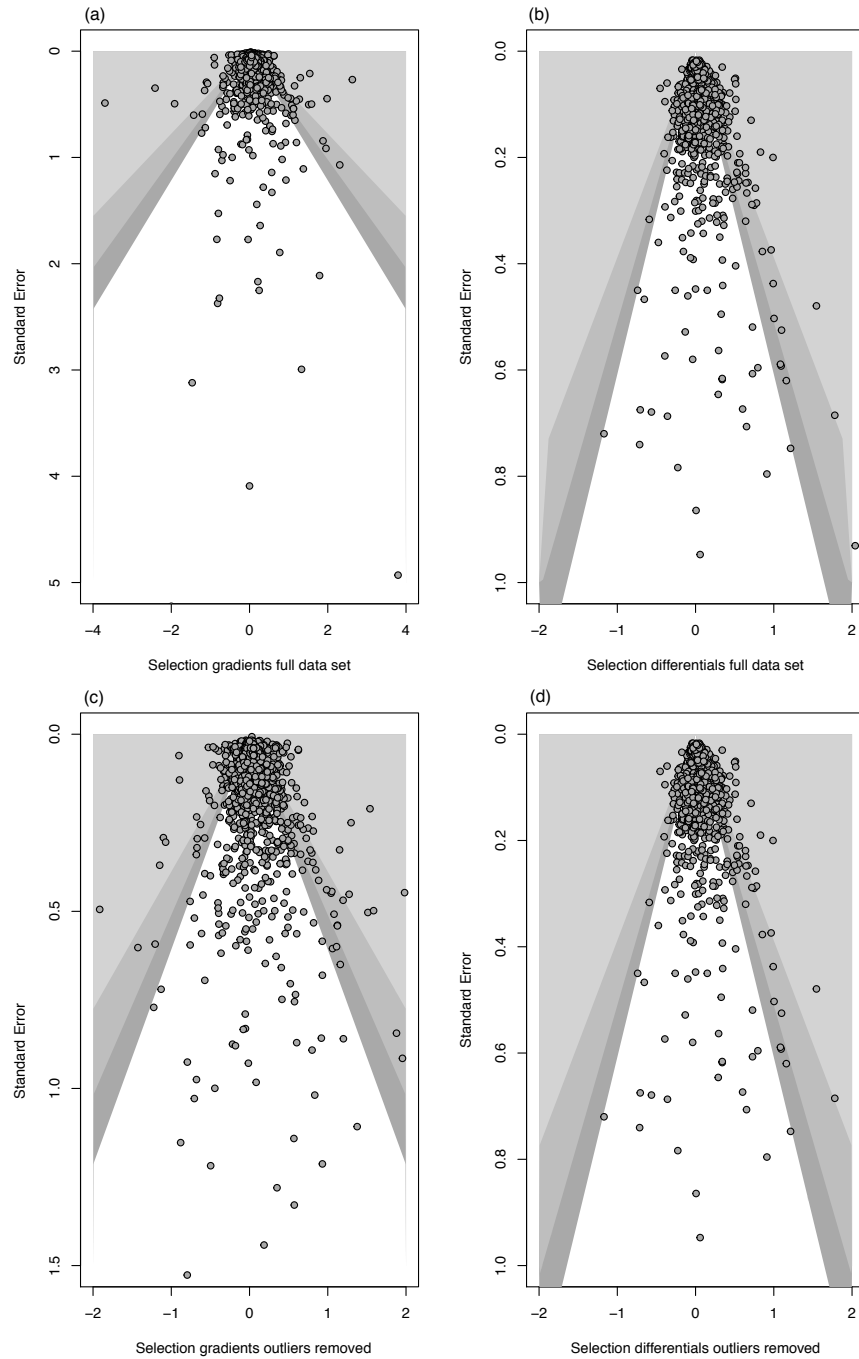

**Figure S1.** Funnel plots for selection gradients and differentials in the full data sets (a and b, gradients and differentials, respectively), and with large outliers removed to show more of the data (c and d, gradient and differentials, respectively). In all cases, there is no strong evidence for publication bias as the distributions of selection coefficients and their standard errors generate funnels that are all largely symmetrical. Each point is an individual selection coefficient and its corresponding standard error.

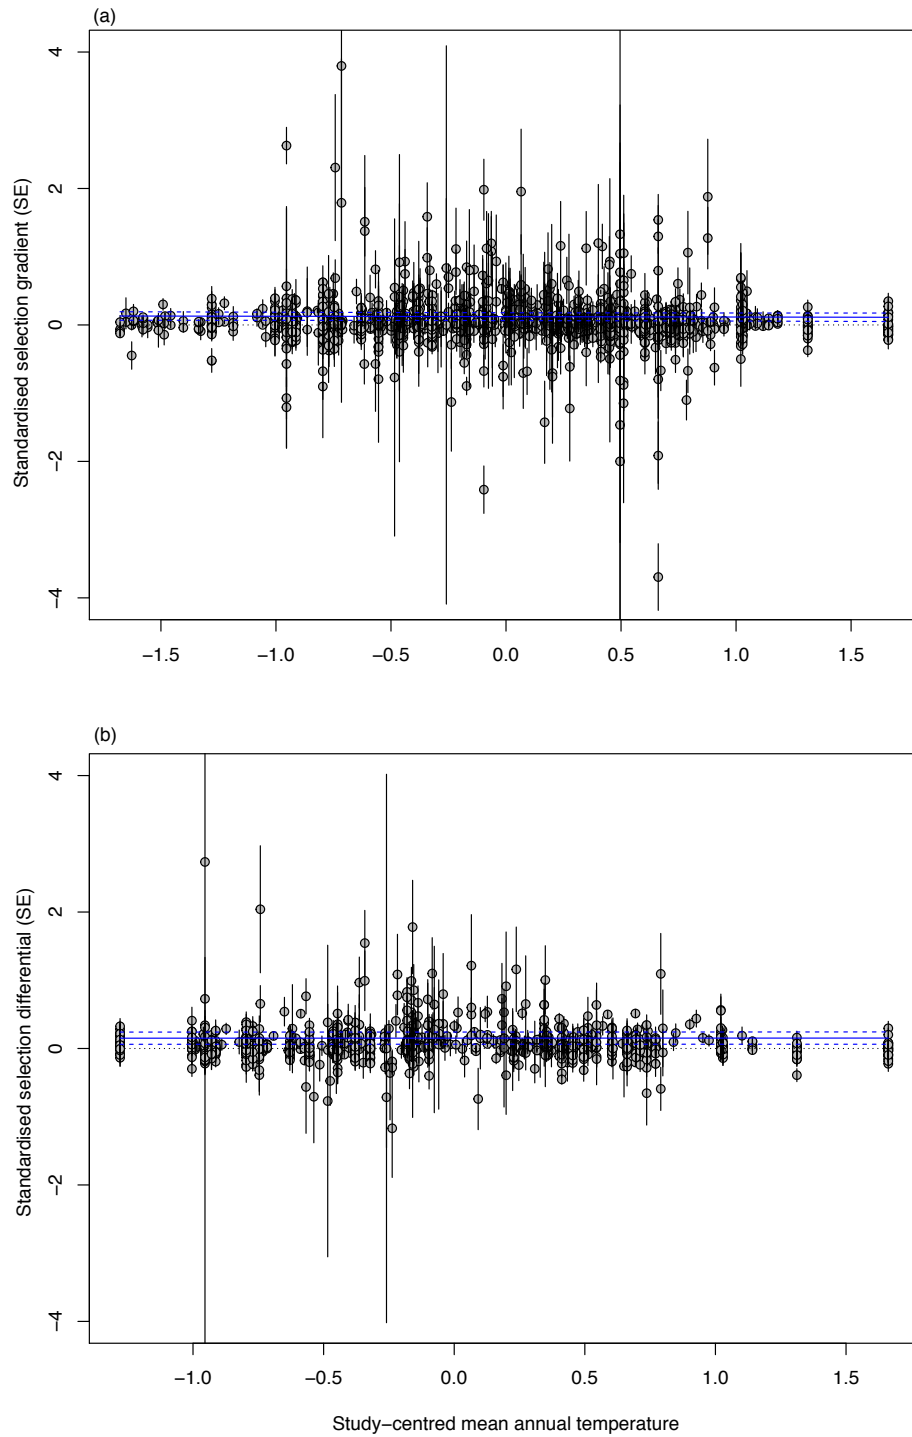

**Figure S2.** The full data set from figure 1 in the main text, showing large outliers.

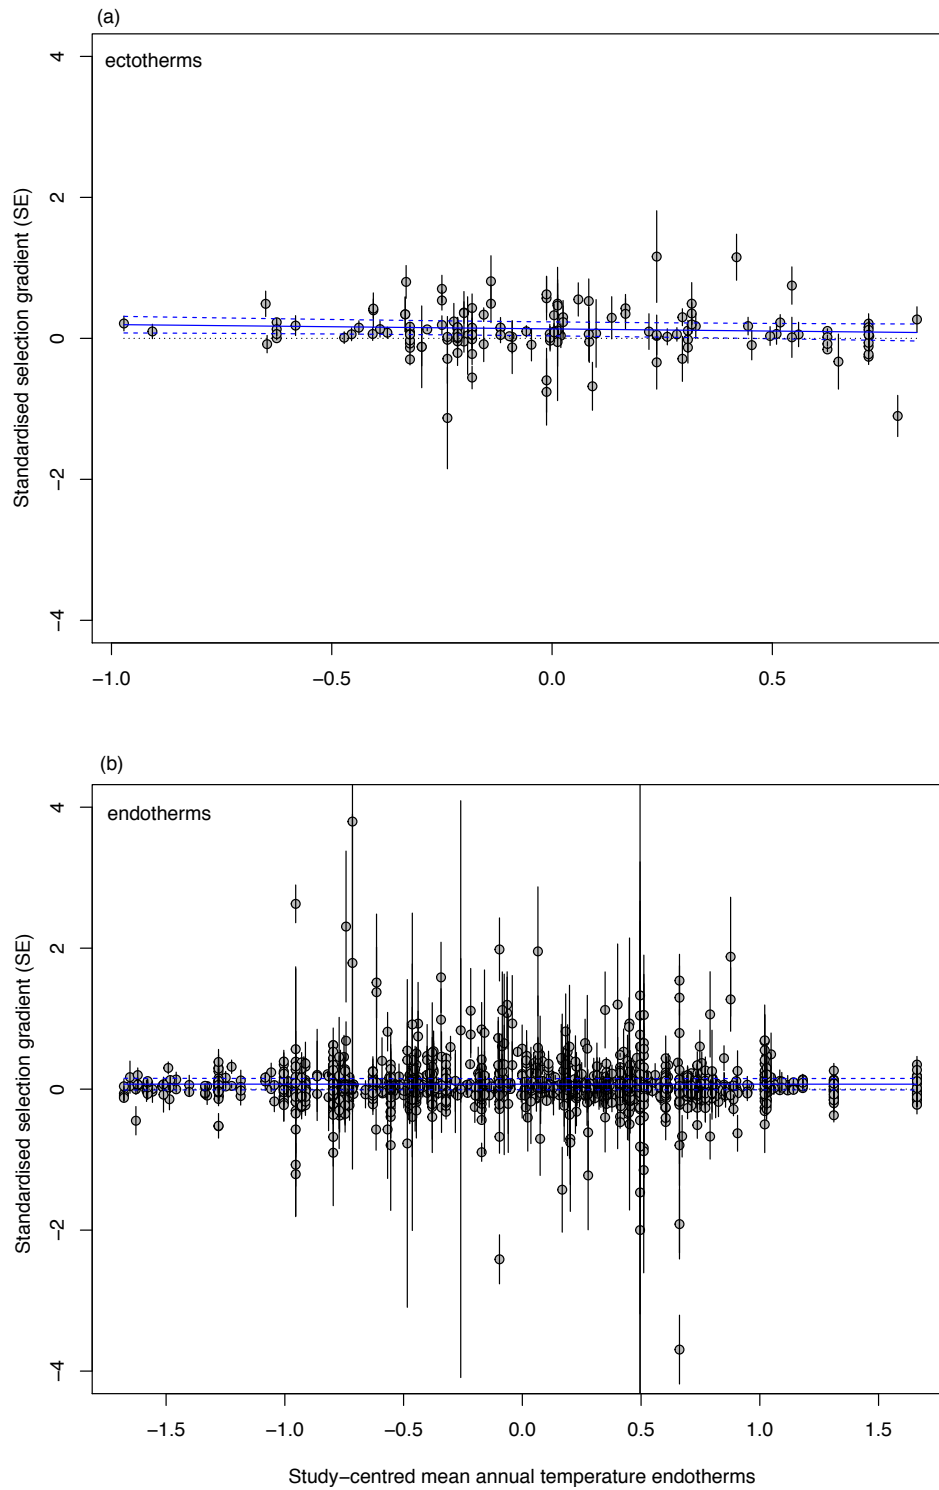

**Figure S3.** The full data set from figure 2 in the main text, showing large outliers.

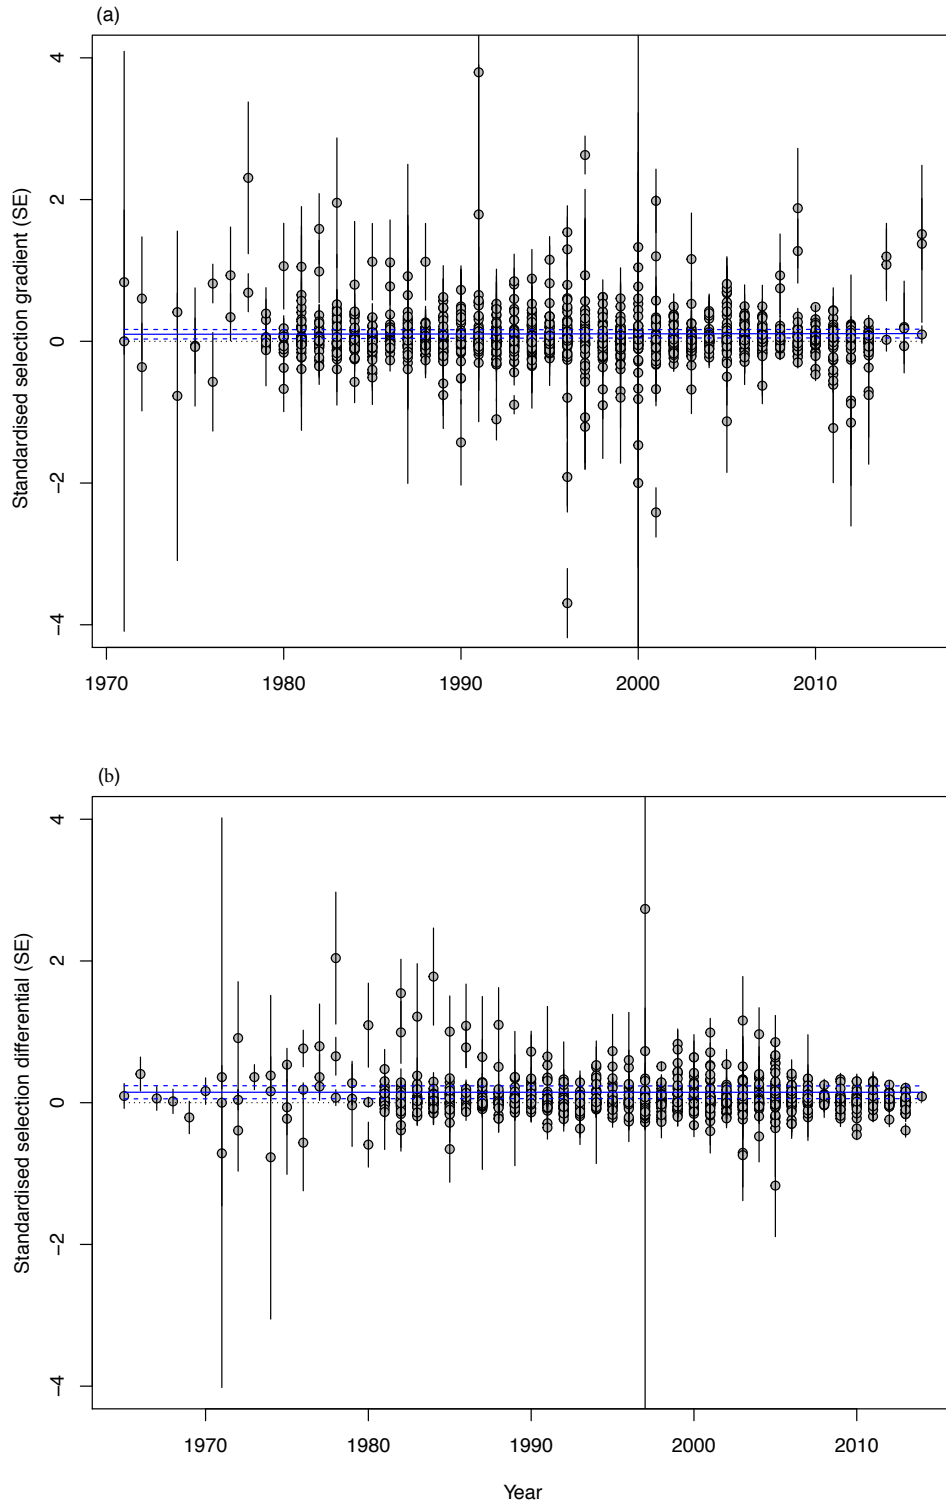

**Figure S4.** The full data set from figure 3 in the main text, showing large outliers.

## References

1. Hadfield, J., and S. Nakagawa. 2010. General quantitative genetic methods for comparative biology: phylogenies, taxonomies and multi-trait models for continuous and categorical characters. *Journal of Evolutionary Biology* **23**:494-508.
2. Nakagawa, S., and E. S. Santos. 2012. Methodological issues and advances in biological meta-analysis. *Evolutionary Ecology* **26**:1253-1274.
3. Katoh, K. & Standley, D. M. 2013. MAFFT multiple sequence alignment software version 7: improvements in performance and usability. *Mol. Biol. Evol.* **30**, 772–780.
4. Kearse, M. et al. 2012. Geneious Basic: An integrated and extendable desktop software platform for the organization and analysis of sequence data. *Bioinformatics* 28: 1647–1649. <https://doi.org/10.1093/bioinformatics/bts199>
5. Lanfear, R., Frandsen, P. B., Wright, A. M., Senfeld, T., Calcott, B. 2017. PartitionFinder 2: new methods for selecting partitioned models of evolution for molecular and morphological phylogenetic analyses. *Molecular Biology and Evolution* 34(3):772-773. <https://DOI: dx.doi.org/10.1093/molbev/msw260>
6. Bouckaert R, Heled J, Kühnert D, Vaughan T, Wu C-H, Xie D, et al. (2014) BEAST 2: A Software Platform for Bayesian Evolutionary Analysis. *PLoS Comput Biol* 10(4): e1003537. <https://doi.org/10.1371/journal.pcbi.1003537>
7. Miller, M. A., Pfeiffer, W. & Schwartz, T. 2010. Creating the CIPRES Science Gateway for inference of large phylogenetic trees. In *Proceedings of the Gateway Computing Environments Workshop (GCE)* 1–8 (IEEE, New Orleans, LA, USA).
8. Paradis, E., Claude, J. & Strimmer, K. 2004. APE: analyses of phylogenetics and evolution in R language. *Bioinformatics* **20**, pp.289-290.
9. Hadfield, J. D. 2010. MCMC methods for multi-response Generalised Linear Mixed Models: the MCMCglmm R package. *J. Stat. Softw.* **33**, 1-22
